# Supplementary material for: Identification of Estrus in Sows Based on Salivary Proteomics
Source: Animals (Basel). 2022 Jun 28;12(13):1656. doi: 10.3390/ani12131656 (PMC9264986; doi:10.3390/ani12131656)
Supplement: Supplementary file 1 [file animals-12-01656-s001.zip › Table S1 Go enrichment analysis of salivary differential protein during estrus cycle.xlsx]

## Sheet: output_identify_20220322094458
#Term	Database	ID	Input number	Background number	P-Value	Corrected P-Value	Input	Hyperlink
Biosynthesis of amino acids	KEGG PATHWAY	ssc01230	4	70	6.49469e-07	7.87146e-05	ARG1|PKM|GAPDH|TALDO1	http://www.genome.jp/kegg-bin/show_pathway?ssc01230/ssc:396823%09red/ssc:100514210%09red/ssc:100158154%09red/ssc:397115%09red
Carbon metabolism	KEGG PATHWAY	ssc01200	4	112	3.93643e-06	0.000228313	PGD|PKM|GAPDH|TALDO1	http://www.genome.jp/kegg-bin/show_pathway?ssc01200/ssc:396823%09red/ssc:100514210%09red/ssc:397546%09red/ssc:100158154%09red
Pentose phosphate pathway	KEGG PATHWAY	ssc00030	2	28	0.000357972	0.0051906	PGD|TALDO1	http://www.genome.jp/kegg-bin/show_pathway?ssc00030/ssc:100514210%09red/ssc:397546%09red
Viral carcinogenesis	KEGG PATHWAY	ssc05203	3	183	0.000676993	0.00818033	YWHAB|YWHAZ|PKM	http://www.genome.jp/kegg-bin/show_pathway?ssc05203/ssc:780440%09red/ssc:100153160%09red/ssc:100158154%09red
Metabolic pathways	KEGG PATHWAY	ssc01100	6	1388	0.00147998	0.0152212	PGD|TALDO1|ARG1|GAPDH|MIF|PKM	http://www.genome.jp/kegg-bin/show_pathway?ssc01100/ssc:100514210%09red/ssc:100158154%09red/ssc:397115%09red/ssc:397546%09red/ssc:397412%09red/ssc:396823%09red
Glycolysis / Gluconeogenesis	KEGG PATHWAY	ssc00010	2	62	0.00162709	0.0152212	GAPDH|PKM	http://www.genome.jp/kegg-bin/show_pathway?ssc00010/ssc:396823%09red/ssc:100158154%09red
IL-17 signaling pathway	KEGG PATHWAY	ssc04657	2	88	0.00318478	0.0271643	S100A7|LCN2	http://www.genome.jp/kegg-bin/show_pathway?ssc04657/ssc:100144623%09red/ssc:100153501%09red
Oocyte meiosis	KEGG PATHWAY	ssc04114	2	115	0.00531381	0.0294598	YWHAB|YWHAZ	http://www.genome.jp/kegg-bin/show_pathway?ssc04114/ssc:780440%09red/ssc:100153160%09red
Cell cycle	KEGG PATHWAY	ssc04110	2	121	0.00585522	0.0303217	YWHAB|YWHAZ	http://www.genome.jp/kegg-bin/show_pathway?ssc04110/ssc:780440%09red/ssc:100153160%09red
Phagosome	KEGG PATHWAY	ssc04145	2	143	0.00804581	0.0323623	CALR|CORO1A	http://www.genome.jp/kegg-bin/show_pathway?ssc04145/ssc:100621483%09red/ssc:100381266%09red
Hepatitis C	KEGG PATHWAY	ssc05160	2	146	0.00836906	0.0323623	YWHAB|YWHAZ	http://www.genome.jp/kegg-bin/show_pathway?ssc05160/ssc:780440%09red/ssc:100153160%09red
Hippo signaling pathway	KEGG PATHWAY	ssc04390	2	150	0.00880907	0.0328738	YWHAB|YWHAZ	http://www.genome.jp/kegg-bin/show_pathway?ssc04390/ssc:780440%09red/ssc:100153160%09red
Hepatitis B	KEGG PATHWAY	ssc05161	2	156	0.00948821	0.0331516	YWHAB|YWHAZ	http://www.genome.jp/kegg-bin/show_pathway?ssc05161/ssc:780440%09red/ssc:100153160%09red
Arginine biosynthesis	KEGG PATHWAY	ssc00220	1	19	0.0185077	0.0409713	ARG1	http://www.genome.jp/kegg-bin/show_pathway?ssc00220/ssc:397115%09red
Phenylalanine metabolism	KEGG PATHWAY	ssc00360	1	21	0.0203403	0.0425107	MIF	http://www.genome.jp/kegg-bin/show_pathway?ssc00360/ssc:397412%09red
Tyrosine metabolism	KEGG PATHWAY	ssc00350	1	35	0.0330767	0.0573448	MIF	http://www.genome.jp/kegg-bin/show_pathway?ssc00350/ssc:397412%09red
Pyruvate metabolism	KEGG PATHWAY	ssc00620	1	37	0.0348831	0.0578063	PKM	http://www.genome.jp/kegg-bin/show_pathway?ssc00620/ssc:100158154%09red
PI3K-Akt signaling pathway	KEGG PATHWAY	ssc04151	2	335	0.0391363	0.0624711	YWHAB|YWHAZ	http://www.genome.jp/kegg-bin/show_pathway?ssc04151/ssc:780440%09red/ssc:100153160%09red
Type II diabetes mellitus	KEGG PATHWAY	ssc04930	1	47	0.0438669	0.0662573	PKM	http://www.genome.jp/kegg-bin/show_pathway?ssc04930/ssc:100158154%09red
Arginine and proline metabolism	KEGG PATHWAY	ssc00330	1	48	0.0447609	0.0669106	ARG1	http://www.genome.jp/kegg-bin/show_pathway?ssc00330/ssc:397115%09red
Glutathione metabolism	KEGG PATHWAY	ssc00480	1	51	0.0474379	0.0694797	PGD	http://www.genome.jp/kegg-bin/show_pathway?ssc00480/ssc:397546%09red

## Sheet: Sheet1
#Term	Database	ID	Input number	Background number	P-Value	Corrected P-Value	Input	Hyperlink
cornified envelope	Gene Ontology	GO:0001533	3	11	2.59605e-07	7.52855e-05	ANXA1|IVL|KRT1	http://amigo.geneontology.org/amigo/term/GO:0001533
extracellular space	Gene Ontology	GO:0005615	8	865	8.14289e-07	7.87146e-05	ANXA1|FCN1|ARG1|CALR|QSOX1|MIF|SERPINB1|S100A7	http://amigo.geneontology.org/amigo/term/GO:0005615
carbohydrate binding	Gene Ontology	GO:0030246	4	101	2.6462e-06	0.000191849	CALR|FCN1|KRT1|LGALS4	http://amigo.geneontology.org/amigo/term/GO:0030246
calcium ion binding	Gene Ontology	GO:0005509	6	542	9.07246e-06	0.000438502	ANXA1|CALR|DSC3|STPG4|DSG3|S100A7	http://amigo.geneontology.org/amigo/term/GO:0005509
pentose-phosphate shunt	Gene Ontology	GO:0006098	2	5	1.75104e-05	0.00072543	PGD|TALDO1	http://amigo.geneontology.org/amigo/term/GO:0006098
defense response to fungus	Gene Ontology	GO:0050832	2	8	3.74578e-05	0.00120697	HRG|GAPDH	http://amigo.geneontology.org/amigo/term/GO:0050832
complement activation, lectin pathway	Gene Ontology	GO:0001867	2	8	3.74578e-05	0.00120697	FCN1|KRT1	http://amigo.geneontology.org/amigo/term/GO:0001867
phagocytic cup	Gene Ontology	GO:0001891	2	12	7.55748e-05	0.00199243	ANXA1|CORO1A	http://amigo.geneontology.org/amigo/term/GO:0001891
negative regulation of cell cycle arrest	Gene Ontology	GO:0071157	2	12	7.55748e-05	0.00199243	CALR|MIF	http://amigo.geneontology.org/amigo/term/GO:0071157
cell-cell junction	Gene Ontology	GO:0005911	3	102	0.00012641	0.00273776	DSG3|CORO1A|DSC3	http://amigo.geneontology.org/amigo/term/GO:0005911
negative regulation of endopeptidase activity	Gene Ontology	GO:0010951	3	106	0.000141217	0.00273776	SERPINB1|HRG|GAPDH	http://amigo.geneontology.org/amigo/term/GO:0010951
peptide cross-linking	Gene Ontology	GO:0018149	2	17	0.000141608	0.00273776	ANXA1|KRT1	http://amigo.geneontology.org/amigo/term/GO:0018149
desmosome	Gene Ontology	GO:0030057	2	17	0.000141608	0.00273776	DSG3|DSC3	http://amigo.geneontology.org/amigo/term/GO:0030057
positive regulation of cytokine secretion	Gene Ontology	GO:0050715	2	18	0.000157253	0.00285021	GAPDH|MIF	http://amigo.geneontology.org/amigo/term/GO:0050715
glycolytic process	Gene Ontology	GO:0006096	2	24	0.000268063	0.00409149	GAPDH|PKM	http://amigo.geneontology.org/amigo/term/GO:0006096
NADP binding	Gene Ontology	GO:0050661	2	24	0.000268063	0.00409149	PGD|GAPDH	http://amigo.geneontology.org/amigo/term/GO:0050661
positive chemotaxis	Gene Ontology	GO:0050918	2	24	0.000268063	0.00409149	CORO1A|MIF	http://amigo.geneontology.org/amigo/term/GO:0050918
keratinocyte differentiation	Gene Ontology	GO:0030216	2	30	0.000407704	0.0056302	ANXA1|IVL	http://amigo.geneontology.org/amigo/term/GO:0030216
antimicrobial humoral immune response mediated by antimicrobial peptide	Gene Ontology	GO:0061844	2	34	0.000516667	0.00681061	HRG|GAPDH	http://amigo.geneontology.org/amigo/term/GO:0061844
positive regulation of T cell proliferation	Gene Ontology	GO:0042102	2	37	0.000606657	0.00764916	ANXA1|CORO1A	http://amigo.geneontology.org/amigo/term/GO:0042102
negative regulation of translation	Gene Ontology	GO:0017148	2	44	0.000843971	0.00979007	CALR|GAPDH	http://amigo.geneontology.org/amigo/term/GO:0017148
calcium-dependent protein binding	Gene Ontology	GO:0048306	2	47	0.000957305	0.0106776	ANXA1|S100A7	http://amigo.geneontology.org/amigo/term/GO:0048306
actin filament	Gene Ontology	GO:0005884	2	61	0.00157714	0.0152212	ANXA1|CORO1A	http://amigo.geneontology.org/amigo/term/GO:0005884
serine-type endopeptidase inhibitor activity	Gene Ontology	GO:0004867	2	62	0.00162709	0.0152212	SERPINB1|HRG	http://amigo.geneontology.org/amigo/term/GO:0004867
cell-cell adhesion	Gene Ontology	GO:0098609	2	62	0.00162709	0.0152212	DSG3|DSC3	http://amigo.geneontology.org/amigo/term/GO:0098609
cytosol	Gene Ontology	GO:0005829	7	2056	0.00221763	0.0200973	ANXA1|PGD|ARG1|CALR|GAPDH|MIF|CORO1A	http://amigo.geneontology.org/amigo/term/GO:0005829
protein folding	Gene Ontology	GO:0006457	2	75	0.00234408	0.0205995	CALR|QSOX1	http://amigo.geneontology.org/amigo/term/GO:0006457
regulation of cell shape	Gene Ontology	GO:0008360	2	92	0.0034679	0.028734	ANXA1|CORO1A	http://amigo.geneontology.org/amigo/term/GO:0008360
cell surface receptor signaling pathway	Gene Ontology	GO:0007166	2	94	0.00361373	0.0291106	ANXA1|MIF	http://amigo.geneontology.org/amigo/term/GO:0007166
cellular response to glucocorticoid stimulus	Gene Ontology	GO:0071385	1	5	0.0055872	0.0294598	ANXA1	http://amigo.geneontology.org/amigo/term/GO:0071385
negative regulation of fibrinolysis	Gene Ontology	GO:0051918	1	5	0.0055872	0.0294598	HRG	http://amigo.geneontology.org/amigo/term/GO:0051918
positive regulation of DNA demethylation	Gene Ontology	GO:1901537	1	5	0.0055872	0.0294598	STPG4	http://amigo.geneontology.org/amigo/term/GO:1901537
aspartic-type endopeptidase inhibitor activity	Gene Ontology	GO:0019828	1	5	0.0055872	0.0294598	GAPDH	http://amigo.geneontology.org/amigo/term/GO:0019828
regulation of meiotic nuclear division	Gene Ontology	GO:0040020	1	5	0.0055872	0.0294598	CALR	http://amigo.geneontology.org/amigo/term/GO:0040020
female pronucleus	Gene Ontology	GO:0001939	1	5	0.0055872	0.0294598	STPG4	http://amigo.geneontology.org/amigo/term/GO:0001939
urea cycle	Gene Ontology	GO:0000050	1	5	0.0055872	0.0294598	ARG1	http://amigo.geneontology.org/amigo/term/GO:0000050
heme transport	Gene Ontology	GO:0015886	1	5	0.0055872	0.0294598	HRG	http://amigo.geneontology.org/amigo/term/GO:0015886
negative regulation of cell adhesion mediated by integrin	Gene Ontology	GO:0033629	1	5	0.0055872	0.0294598	HRG	http://amigo.geneontology.org/amigo/term/GO:0033629
positive regulation of dendritic cell chemotaxis	Gene Ontology	GO:2000510	1	5	0.0055872	0.0294598	CALR	http://amigo.geneontology.org/amigo/term/GO:2000510
endoplasmic reticulum quality control compartment	Gene Ontology	GO:0044322	1	5	0.0055872	0.0294598	CALR	http://amigo.geneontology.org/amigo/term/GO:0044322
neutrophil clearance	Gene Ontology	GO:0097350	1	5	0.0055872	0.0294598	ANXA1	http://amigo.geneontology.org/amigo/term/GO:0097350
MHC class I peptide loading complex	Gene Ontology	GO:0042824	1	5	0.0055872	0.0294598	CALR	http://amigo.geneontology.org/amigo/term/GO:0042824
carbohydrate derivative binding	Gene Ontology	GO:0097367	1	5	0.0055872	0.0294598	FCN1	http://amigo.geneontology.org/amigo/term/GO:0097367
Barr body	Gene Ontology	GO:0001740	1	5	0.0055872	0.0294598	H3F3A	http://amigo.geneontology.org/amigo/term/GO:0001740
regulation of cell death	Gene Ontology	GO:0010941	1	5	0.0055872	0.0294598	YWHAZ	http://amigo.geneontology.org/amigo/term/GO:0010941
alpha-beta T cell differentiation	Gene Ontology	GO:0046632	1	5	0.0055872	0.0294598	ANXA1	http://amigo.geneontology.org/amigo/term/GO:0046632
negative regulation of macrophage chemotaxis	Gene Ontology	GO:0010760	1	5	0.0055872	0.0294598	MIF	http://amigo.geneontology.org/amigo/term/GO:0010760
germinal vesicle	Gene Ontology	GO:0042585	1	6	0.00651548	0.0304757	STPG4	http://amigo.geneontology.org/amigo/term/GO:0042585
negative regulation of vascular endothelial growth factor signaling pathway	Gene Ontology	GO:1900747	1	6	0.00651548	0.0304757	HRG	http://amigo.geneontology.org/amigo/term/GO:1900747
type B pancreatic cell proliferation	Gene Ontology	GO:0044342	1	6	0.00651548	0.0304757	SERPINB1	http://amigo.geneontology.org/amigo/term/GO:0044342
positive regulation of protein kinase A signaling	Gene Ontology	GO:0010739	1	6	0.00651548	0.0304757	MIF	http://amigo.geneontology.org/amigo/term/GO:0010739
keratinization	Gene Ontology	GO:0031424	1	6	0.00651548	0.0304757	IVL	http://amigo.geneontology.org/amigo/term/GO:0031424
negative regulation of trophoblast cell migration	Gene Ontology	GO:1901164	1	6	0.00651548	0.0304757	CALR	http://amigo.geneontology.org/amigo/term/GO:1901164
extrinsic component of endosome membrane	Gene Ontology	GO:0031313	1	7	0.00744293	0.0317419	ANXA1	http://amigo.geneontology.org/amigo/term/GO:0031313
positive regulation of lipopolysaccharide-mediated signaling pathway	Gene Ontology	GO:0031666	1	7	0.00744293	0.0317419	MIF	http://amigo.geneontology.org/amigo/term/GO:0031666
cytokine receptor binding	Gene Ontology	GO:0005126	1	7	0.00744293	0.0317419	MIF	http://amigo.geneontology.org/amigo/term/GO:0005126
negative regulation of activated T cell proliferation	Gene Ontology	GO:0046007	1	7	0.00744293	0.0317419	ARG1	http://amigo.geneontology.org/amigo/term/GO:0046007
hepatocyte differentiation	Gene Ontology	GO:0070365	1	7	0.00744293	0.0317419	ANXA1	http://amigo.geneontology.org/amigo/term/GO:0070365
response to X-ray	Gene Ontology	GO:0010165	1	7	0.00744293	0.0317419	ANXA1	http://amigo.geneontology.org/amigo/term/GO:0010165
protein homotrimerization	Gene Ontology	GO:0070207	1	8	0.00836955	0.0323623	MIF	http://amigo.geneontology.org/amigo/term/GO:0070207
response to peptide hormone	Gene Ontology	GO:0043434	1	8	0.00836955	0.0323623	ANXA1	http://amigo.geneontology.org/amigo/term/GO:0043434
tube formation	Gene Ontology	GO:0035148	1	8	0.00836955	0.0323623	YWHAZ	http://amigo.geneontology.org/amigo/term/GO:0035148
muscle cell differentiation	Gene Ontology	GO:0042692	1	8	0.00836955	0.0323623	H3F3A	http://amigo.geneontology.org/amigo/term/GO:0042692
potassium ion binding	Gene Ontology	GO:0030955	1	8	0.00836955	0.0323623	PKM	http://amigo.geneontology.org/amigo/term/GO:0030955
inflammatory response	Gene Ontology	GO:0006954	2	150	0.00880907	0.0328738	ANXA1|MIF	http://amigo.geneontology.org/amigo/term/GO:0006954
regulation of protein-containing complex assembly	Gene Ontology	GO:0043254	1	9	0.00929534	0.0328738	HRG	http://amigo.geneontology.org/amigo/term/GO:0043254
heparan sulfate proteoglycan binding	Gene Ontology	GO:0043395	1	9	0.00929534	0.0328738	HRG	http://amigo.geneontology.org/amigo/term/GO:0043395
protein heterotetramerization	Gene Ontology	GO:0051290	1	9	0.00929534	0.0328738	KRT1	http://amigo.geneontology.org/amigo/term/GO:0051290
nerve growth factor signaling pathway	Gene Ontology	GO:0038180	1	9	0.00929534	0.0328738	CORO1A	http://amigo.geneontology.org/amigo/term/GO:0038180
negative regulation of intrinsic apoptotic signaling pathway in response to DNA damage by p53 class mediator	Gene Ontology	GO:1902166	1	9	0.00929534	0.0328738	MIF	http://amigo.geneontology.org/amigo/term/GO:1902166
antigen binding	Gene Ontology	GO:0003823	1	10	0.0102203	0.0336149	FCN1	http://amigo.geneontology.org/amigo/term/GO:0003823
prostaglandin biosynthetic process	Gene Ontology	GO:0001516	1	10	0.0102203	0.0336149	MIF	http://amigo.geneontology.org/amigo/term/GO:0001516
regulation of release of sequestered calcium ion into cytosol	Gene Ontology	GO:0051279	1	10	0.0102203	0.0336149	CORO1A	http://amigo.geneontology.org/amigo/term/GO:0051279
regulation of peptidyl-tyrosine phosphorylation	Gene Ontology	GO:0050730	1	10	0.0102203	0.0336149	HRG	http://amigo.geneontology.org/amigo/term/GO:0050730
signaling receptor binding	Gene Ontology	GO:0005102	2	166	0.0106705	0.0336149	HRG|FCN1	http://amigo.geneontology.org/amigo/term/GO:0005102
nucleus organization	Gene Ontology	GO:0006997	1	11	0.0111444	0.0336149	H3F3A	http://amigo.geneontology.org/amigo/term/GO:0006997
DNA damage response, signal transduction by p53 class mediator	Gene Ontology	GO:0030330	1	11	0.0111444	0.0336149	MIF	http://amigo.geneontology.org/amigo/term/GO:0030330
positive regulation of focal adhesion assembly	Gene Ontology	GO:0051894	1	11	0.0111444	0.0336149	HRG	http://amigo.geneontology.org/amigo/term/GO:0051894
response to interleukin-1	Gene Ontology	GO:0070555	1	11	0.0111444	0.0336149	ANXA1	http://amigo.geneontology.org/amigo/term/GO:0070555
cell aging	Gene Ontology	GO:0007569	1	11	0.0111444	0.0336149	MIF	http://amigo.geneontology.org/amigo/term/GO:0007569
gamma-catenin binding	Gene Ontology	GO:0045295	1	11	0.0111444	0.0336149	DSC3	http://amigo.geneontology.org/amigo/term/GO:0045295
respiratory system process	Gene Ontology	GO:0003016	1	11	0.0111444	0.0336149	YWHAZ	http://amigo.geneontology.org/amigo/term/GO:0003016
protein disulfide isomerase activity	Gene Ontology	GO:0003756	1	11	0.0111444	0.0336149	QSOX1	http://amigo.geneontology.org/amigo/term/GO:0003756
protein heterodimerization activity	Gene Ontology	GO:0046982	2	175	0.0117876	0.0336149	KRT1|H3F3A	http://amigo.geneontology.org/amigo/term/GO:0046982
ubiquitin protein ligase binding	Gene Ontology	GO:0031625	2	176	0.0119147	0.0336149	YWHAZ|CALR	http://amigo.geneontology.org/amigo/term/GO:0031625
cell-substrate adhesion	Gene Ontology	GO:0031589	1	12	0.0120677	0.0336149	CORO1A	http://amigo.geneontology.org/amigo/term/GO:0031589
cellular response to vascular endothelial growth factor stimulus	Gene Ontology	GO:0035924	1	12	0.0120677	0.0336149	ANXA1	http://amigo.geneontology.org/amigo/term/GO:0035924
phosphatidylinositol 3-kinase binding	Gene Ontology	GO:0043548	1	12	0.0120677	0.0336149	CORO1A	http://amigo.geneontology.org/amigo/term/GO:0043548
cellular_component	Gene Ontology	GO:0005575	1	12	0.0120677	0.0336149	TALDO1	http://amigo.geneontology.org/amigo/term/GO:0005575
negative regulation of DNA damage response, signal transduction by p53 class mediator	Gene Ontology	GO:0043518	1	12	0.0120677	0.0336149	MIF	http://amigo.geneontology.org/amigo/term/GO:0043518
transition metal ion binding	Gene Ontology	GO:0046914	1	12	0.0120677	0.0336149	S100A7	http://amigo.geneontology.org/amigo/term/GO:0046914
innate immune response	Gene Ontology	GO:0045087	2	178	0.0121709	0.0336149	ANXA1|MIF	http://amigo.geneontology.org/amigo/term/GO:0045087
positive regulation of interleukin-2 production	Gene Ontology	GO:0032743	1	13	0.0129902	0.0348811	ANXA1	http://amigo.geneontology.org/amigo/term/GO:0032743
positive regulation of cell migration involved in sprouting angiogenesis	Gene Ontology	GO:0090050	1	13	0.0129902	0.0348811	ANXA1	http://amigo.geneontology.org/amigo/term/GO:0090050
endocrine pancreas development	Gene Ontology	GO:0031018	1	13	0.0129902	0.0348811	ANXA1	http://amigo.geneontology.org/amigo/term/GO:0031018
glutamatergic synapse	Gene Ontology	GO:0098978	2	187	0.0133536	0.0350821	YWHAZ|CORO1A	http://amigo.geneontology.org/amigo/term/GO:0098978
establishment of skin barrier	Gene Ontology	GO:0061436	1	14	0.0139119	0.0350821	KRT1	http://amigo.geneontology.org/amigo/term/GO:0061436
regulation of ERK1 and ERK2 cascade	Gene Ontology	GO:0070372	1	14	0.0139119	0.0350821	YWHAZ	http://amigo.geneontology.org/amigo/term/GO:0070372
defense response to protozoan	Gene Ontology	GO:0042832	1	14	0.0139119	0.0350821	ARG1	http://amigo.geneontology.org/amigo/term/GO:0042832
response to estradiol	Gene Ontology	GO:0032355	1	14	0.0139119	0.0350821	ANXA1	http://amigo.geneontology.org/amigo/term/GO:0032355
leukocyte chemotaxis	Gene Ontology	GO:0030595	1	14	0.0139119	0.0350821	CORO1A	http://amigo.geneontology.org/amigo/term/GO:0030595
positive regulation of wound healing	Gene Ontology	GO:0090303	1	14	0.0139119	0.0350821	ANXA1	http://amigo.geneontology.org/amigo/term/GO:0090303
cellular senescence	Gene Ontology	GO:0090398	1	16	0.0157527	0.0393817	CALR	http://amigo.geneontology.org/amigo/term/GO:0090398
small molecule binding	Gene Ontology	GO:0036094	1	17	0.0166718	0.0402903	LCN2	http://amigo.geneontology.org/amigo/term/GO:0036094
disordered domain specific binding	Gene Ontology	GO:0097718	1	17	0.0166718	0.0402903	GAPDH	http://amigo.geneontology.org/amigo/term/GO:0097718
protein export from nucleus	Gene Ontology	GO:0006611	1	17	0.0166718	0.0402903	CALR	http://amigo.geneontology.org/amigo/term/GO:0006611
endopeptidase inhibitor activity	Gene Ontology	GO:0004866	1	17	0.0166718	0.0402903	HRG	http://amigo.geneontology.org/amigo/term/GO:0004866
protein localization to nucleus	Gene Ontology	GO:0034504	1	18	0.0175902	0.0409713	CALR	http://amigo.geneontology.org/amigo/term/GO:0034504
ERK1 and ERK2 cascade	Gene Ontology	GO:0070371	1	18	0.0175902	0.0409713	YWHAZ	http://amigo.geneontology.org/amigo/term/GO:0070371
protein targeting	Gene Ontology	GO:0006605	1	18	0.0175902	0.0409713	YWHAZ	http://amigo.geneontology.org/amigo/term/GO:0006605
actin monomer binding	Gene Ontology	GO:0003785	1	18	0.0175902	0.0409713	CORO1A	http://amigo.geneontology.org/amigo/term/GO:0003785
chemoattractant activity	Gene Ontology	GO:0042056	1	19	0.0185077	0.0409713	MIF	http://amigo.geneontology.org/amigo/term/GO:0042056
cellular response to interleukin-4	Gene Ontology	GO:0071353	1	19	0.0185077	0.0409713	CORO1A	http://amigo.geneontology.org/amigo/term/GO:0071353
arachidonic acid secretion	Gene Ontology	GO:0050482	1	19	0.0185077	0.0409713	ANXA1	http://amigo.geneontology.org/amigo/term/GO:0050482
platelet activation	Gene Ontology	GO:0030168	1	19	0.0185077	0.0409713	HRG	http://amigo.geneontology.org/amigo/term/GO:0030168
androgen receptor binding	Gene Ontology	GO:0050681	1	19	0.0185077	0.0409713	CALR	http://amigo.geneontology.org/amigo/term/GO:0050681
oogenesis	Gene Ontology	GO:0048477	1	19	0.0185077	0.0409713	H3F3A	http://amigo.geneontology.org/amigo/term/GO:0048477
positive regulation of G1/S transition of mitotic cell cycle	Gene Ontology	GO:1900087	1	20	0.0194244	0.0417265	ANXA1	http://amigo.geneontology.org/amigo/term/GO:1900087
insulin secretion	Gene Ontology	GO:0030073	1	20	0.0194244	0.0417265	ANXA1	http://amigo.geneontology.org/amigo/term/GO:0030073
negative regulation of catalytic activity	Gene Ontology	GO:0043086	1	20	0.0194244	0.0417265	ANXA1	http://amigo.geneontology.org/amigo/term/GO:0043086
hippocampal mossy fiber to CA3 synapse	Gene Ontology	GO:0098686	1	20	0.0194244	0.0417265	YWHAZ	http://amigo.geneontology.org/amigo/term/GO:0098686
immunological synapse	Gene Ontology	GO:0001772	1	21	0.0203403	0.0425107	CORO1A	http://amigo.geneontology.org/amigo/term/GO:0001772
embryo implantation	Gene Ontology	GO:0007566	1	21	0.0203403	0.0425107	H3F3A	http://amigo.geneontology.org/amigo/term/GO:0007566
cytoplasm	Gene Ontology	GO:0005737	6	2398	0.0207178	0.0425107	ANXA1|TALDO1|IVL|ARG1|SERPINB1|PKM	http://amigo.geneontology.org/amigo/term/GO:0005737
homeostasis of number of cells within a tissue	Gene Ontology	GO:0048873	1	22	0.0212553	0.0425107	CORO1A	http://amigo.geneontology.org/amigo/term/GO:0048873
polysome	Gene Ontology	GO:0005844	1	22	0.0212553	0.0425107	CALR	http://amigo.geneontology.org/amigo/term/GO:0005844
positive regulation of endothelial cell migration	Gene Ontology	GO:0010595	1	22	0.0212553	0.0425107	CALR	http://amigo.geneontology.org/amigo/term/GO:0010595
positive regulation of substrate adhesion-dependent cell spreading	Gene Ontology	GO:1900026	1	22	0.0212553	0.0425107	CALR	http://amigo.geneontology.org/amigo/term/GO:1900026
cysteine-type endopeptidase inhibitor activity	Gene Ontology	GO:0004869	1	22	0.0212553	0.0425107	HRG	http://amigo.geneontology.org/amigo/term/GO:0004869
NAD+ ADP-ribosyltransferase activity	Gene Ontology	GO:0003950	1	22	0.0212553	0.0425107	PKM	http://amigo.geneontology.org/amigo/term/GO:0003950
cortical actin cytoskeleton organization	Gene Ontology	GO:0030866	1	23	0.0221696	0.0437359	CALR	http://amigo.geneontology.org/amigo/term/GO:0030866
T cell homeostasis	Gene Ontology	GO:0043029	1	23	0.0221696	0.0437359	CORO1A	http://amigo.geneontology.org/amigo/term/GO:0043029
identical protein binding	Gene Ontology	GO:0042802	3	655	0.0227079	0.0444952	YWHAZ|GAPDH|MIF	http://amigo.geneontology.org/amigo/term/GO:0042802
glucose metabolic process	Gene Ontology	GO:0006006	1	24	0.023083	0.0446271	GAPDH	http://amigo.geneontology.org/amigo/term/GO:0006006
cellular response to hydrogen peroxide	Gene Ontology	GO:0070301	1	24	0.023083	0.0446271	ANXA1	http://amigo.geneontology.org/amigo/term/GO:0070301
monocyte chemotaxis	Gene Ontology	GO:0002548	1	25	0.0239956	0.0457811	ANXA1	http://amigo.geneontology.org/amigo/term/GO:0002548
positive regulation of B cell proliferation	Gene Ontology	GO:0030890	1	25	0.0239956	0.0457811	MIF	http://amigo.geneontology.org/amigo/term/GO:0030890
positive regulation of MAP kinase activity	Gene Ontology	GO:0043406	1	29	0.0276378	0.0517094	MIF	http://amigo.geneontology.org/amigo/term/GO:0043406
lateral plasma membrane	Gene Ontology	GO:0016328	1	29	0.0276378	0.0517094	ANXA1	http://amigo.geneontology.org/amigo/term/GO:0016328
positive regulation of tumor necrosis factor production	Gene Ontology	GO:0032760	1	29	0.0276378	0.0517094	MIF	http://amigo.geneontology.org/amigo/term/GO:0032760
phagocytosis	Gene Ontology	GO:0006909	1	30	0.0285463	0.0530669	ANXA1	http://amigo.geneontology.org/amigo/term/GO:0006909
nucleosome	Gene Ontology	GO:0000786	1	31	0.029454	0.0533854	H3F3A	http://amigo.geneontology.org/amigo/term/GO:0000786
positive regulation of phagocytosis	Gene Ontology	GO:0050766	1	31	0.029454	0.0533854	CALR	http://amigo.geneontology.org/amigo/term/GO:0050766
NAD binding	Gene Ontology	GO:0051287	1	31	0.029454	0.0533854	GAPDH	http://amigo.geneontology.org/amigo/term/GO:0051287
G protein-coupled receptor signaling pathway, coupled to cyclic nucleotide second messenger	Gene Ontology	GO:0007187	1	31	0.029454	0.0533854	ANXA1	http://amigo.geneontology.org/amigo/term/GO:0007187
calcium ion transport	Gene Ontology	GO:0006816	1	32	0.0303609	0.0546873	CORO1A	http://amigo.geneontology.org/amigo/term/GO:0006816
cytoplasmic vesicle membrane	Gene Ontology	GO:0030659	1	33	0.031267	0.0556283	ANXA1	http://amigo.geneontology.org/amigo/term/GO:0030659
single fertilization	Gene Ontology	GO:0007338	1	33	0.031267	0.0556283	H3F3A	http://amigo.geneontology.org/amigo/term/GO:0007338
early endosome membrane	Gene Ontology	GO:0031901	1	35	0.0330767	0.0573448	ANXA1	http://amigo.geneontology.org/amigo/term/GO:0031901
adaptive immune response	Gene Ontology	GO:0002250	1	35	0.0330767	0.0573448	ANXA1	http://amigo.geneontology.org/amigo/term/GO:0002250
collagen trimer	Gene Ontology	GO:0005581	1	35	0.0330767	0.0573448	FCN1	http://amigo.geneontology.org/amigo/term/GO:0005581
cell surface	Gene Ontology	GO:0009986	2	306	0.0332204	0.0573448	HRG|MIF	http://amigo.geneontology.org/amigo/term/GO:0009986
endoplasmic reticulum unfolded protein response	Gene Ontology	GO:0030968	1	36	0.0339803	0.0576274	CALR	http://amigo.geneontology.org/amigo/term/GO:0030968
cytoplasmic ribonucleoprotein granule	Gene Ontology	GO:0036464	1	36	0.0339803	0.0576274	SERPINB1	http://amigo.geneontology.org/amigo/term/GO:0036464
positive regulation of fibroblast proliferation	Gene Ontology	GO:0048146	1	36	0.0339803	0.0576274	MIF	http://amigo.geneontology.org/amigo/term/GO:0048146
actin cytoskeleton reorganization	Gene Ontology	GO:0031532	1	37	0.0348831	0.0578063	ANXA1	http://amigo.geneontology.org/amigo/term/GO:0031532
regulation of inflammatory response	Gene Ontology	GO:0050727	1	37	0.0348831	0.0578063	ANXA1	http://amigo.geneontology.org/amigo/term/GO:0050727
positive regulation of NIK/NF-kappaB signaling	Gene Ontology	GO:1901224	1	37	0.0348831	0.0578063	CALR	http://amigo.geneontology.org/amigo/term/GO:1901224
scavenger receptor activity	Gene Ontology	GO:0005044	1	39	0.0366863	0.0601076	CFI	http://amigo.geneontology.org/amigo/term/GO:0005044
regulation of actin cytoskeleton organization	Gene Ontology	GO:0032956	1	39	0.0366863	0.0601076	HRG	http://amigo.geneontology.org/amigo/term/GO:0032956
cortical actin cytoskeleton	Gene Ontology	GO:0030864	1	40	0.0375867	0.0612368	CORO1A	http://amigo.geneontology.org/amigo/term/GO:0030864
manganese ion binding	Gene Ontology	GO:0030145	1	41	0.0384863	0.0620057	ARG1	http://amigo.geneontology.org/amigo/term/GO:0030145
negative regulation of neuron differentiation	Gene Ontology	GO:0045665	1	41	0.0384863	0.0620057	CALR	http://amigo.geneontology.org/amigo/term/GO:0045665
integral component of Golgi membrane	Gene Ontology	GO:0030173	1	42	0.0393851	0.0624711	QSOX1	http://amigo.geneontology.org/amigo/term/GO:0030173
positive regulation of peptidyl-tyrosine phosphorylation	Gene Ontology	GO:0050731	1	43	0.0402831	0.0624711	MIF	http://amigo.geneontology.org/amigo/term/GO:0050731
osteoblast differentiation	Gene Ontology	GO:0001649	1	43	0.0402831	0.0624711	H3F3A	http://amigo.geneontology.org/amigo/term/GO:0001649
keratin filament	Gene Ontology	GO:0045095	1	43	0.0402831	0.0624711	KRT1	http://amigo.geneontology.org/amigo/term/GO:0045095
cellular response to insulin stimulus	Gene Ontology	GO:0032869	1	43	0.0402831	0.0624711	PKM	http://amigo.geneontology.org/amigo/term/GO:0032869
calcium-dependent phospholipid binding	Gene Ontology	GO:0005544	1	43	0.0402831	0.0624711	ANXA1	http://amigo.geneontology.org/amigo/term/GO:0005544
lung development	Gene Ontology	GO:0030324	1	46	0.0429721	0.0659361	YWHAZ	http://amigo.geneontology.org/amigo/term/GO:0030324
DNA duplex unwinding	Gene Ontology	GO:0032508	1	46	0.0429721	0.0659361	ANXA1	http://amigo.geneontology.org/amigo/term/GO:0032508
extracellular exosome	Gene Ontology	GO:0070062	1	47	0.0438669	0.0662573	ANXA1	http://amigo.geneontology.org/amigo/term/GO:0070062
spermatid development	Gene Ontology	GO:0007286	1	47	0.0438669	0.0662573	H3F3A	http://amigo.geneontology.org/amigo/term/GO:0007286
phagocytic vesicle	Gene Ontology	GO:0045335	1	48	0.0447609	0.0669106	CORO1A	http://amigo.geneontology.org/amigo/term/GO:0045335
sarcolemma	Gene Ontology	GO:0042383	1	49	0.045654	0.0678957	ANXA1	http://amigo.geneontology.org/amigo/term/GO:0042383
positive regulation of peptidyl-serine phosphorylation	Gene Ontology	GO:0033138	1	51	0.0474379	0.0694797	MIF	http://amigo.geneontology.org/amigo/term/GO:0033138
lipid droplet	Gene Ontology	GO:0005811	1	51	0.0474379	0.0694797	GAPDH	http://amigo.geneontology.org/amigo/term/GO:0005811
kinase activity	Gene Ontology	GO:0016301	1	53	0.0492186	0.0713669	PKM	http://amigo.geneontology.org/amigo/term/GO:0016301

## Sheet: Sheet2
#Term	Database	ID	Input number	Background number	P-Value	Corrected P-Value	Input	Hyperlink
cornified envelope	Gene Ontology	GO:0001533	3	11	2.59605e-07	7.52855e-05	ANXA1|IVL|KRT1	http://amigo.geneontology.org/amigo/term/GO:0001533
extracellular space	Gene Ontology	GO:0005615	8	865	8.14289e-07	7.87146e-05	ANXA1|FCN1|ARG1|CALR|QSOX1|MIF|SERPINB1|S100A7	http://amigo.geneontology.org/amigo/term/GO:0005615
carbohydrate binding	Gene Ontology	GO:0030246	4	101	2.6462e-06	0.000191849	CALR|FCN1|KRT1|LGALS4	http://amigo.geneontology.org/amigo/term/GO:0030246
calcium ion binding	Gene Ontology	GO:0005509	6	542	9.07246e-06	0.000438502	ANXA1|CALR|DSC3|STPG4|DSG3|S100A7	http://amigo.geneontology.org/amigo/term/GO:0005509
pentose-phosphate shunt	Gene Ontology	GO:0006098	2	5	1.75104e-05	0.00072543	PGD|TALDO1	http://amigo.geneontology.org/amigo/term/GO:0006098
defense response to fungus	Gene Ontology	GO:0050832	2	8	3.74578e-05	0.00120697	HRG|GAPDH	http://amigo.geneontology.org/amigo/term/GO:0050832
complement activation, lectin pathway	Gene Ontology	GO:0001867	2	8	3.74578e-05	0.00120697	FCN1|KRT1	http://amigo.geneontology.org/amigo/term/GO:0001867
phagocytic cup	Gene Ontology	GO:0001891	2	12	7.55748e-05	0.00199243	ANXA1|CORO1A	http://amigo.geneontology.org/amigo/term/GO:0001891
peptide cross-linking	Gene Ontology	GO:0018149	2	17	0.000141608	0.00273776	ANXA1|KRT1	http://amigo.geneontology.org/amigo/term/GO:0018149
desmosome	Gene Ontology	GO:0030057	2	17	0.000141608	0.00273776	DSG3|DSC3	http://amigo.geneontology.org/amigo/term/GO:0030057
regulation of meiotic nuclear division	Gene Ontology	GO:0040020	1	5	0.0055872	0.0294598	CALR	http://amigo.geneontology.org/amigo/term/GO:0040020
female pronucleus	Gene Ontology	GO:0001939	1	5	0.0055872	0.0294598	STPG4	http://amigo.geneontology.org/amigo/term/GO:0001939
response to peptide hormone	Gene Ontology	GO:0043434	1	8	0.00836955	0.0323623	ANXA1	http://amigo.geneontology.org/amigo/term/GO:0043434
response to estradiol	Gene Ontology	GO:0032355	1	14	0.0139119	0.0350821	ANXA1	http://amigo.geneontology.org/amigo/term/GO:0032355
oogenesis	Gene Ontology	GO:0048477	1	19	0.0185077	0.0409713	H3F3A	http://amigo.geneontology.org/amigo/term/GO:0048477
